# Supplementary material for: First-Line Ipatasertib, Atezolizumab, and Taxane Triplet for Metastatic Triple-Negative Breast Cancer: Clinical and Biomarker Results
Source: PubMed Central journal article supplement — Clin Cancer Res. 2023 Dec 7;30(4):767–78. doi: 10.1158/1078-0432.CCR-23-2084 (PMC10870115; doi:10.1158/1078-0432.ccr-23-2084), 2023-12-07

**Supplementary Table S1.** Representativeness of study participants.

|                                                 |                                                                                                                                                                                                                                                                                                                                                                                                                                                                                                                                                                                                                                                             |
|-------------------------------------------------|-------------------------------------------------------------------------------------------------------------------------------------------------------------------------------------------------------------------------------------------------------------------------------------------------------------------------------------------------------------------------------------------------------------------------------------------------------------------------------------------------------------------------------------------------------------------------------------------------------------------------------------------------------------|
| <b>Cancer type</b>                              | Locally advanced/metastatic TNBC, no prior systemic therapy in the locally advanced/metastatic setting.                                                                                                                                                                                                                                                                                                                                                                                                                                                                                                                                                     |
| <b>Sex</b>                                      | Breast cancer, including TNBC, is a predominantly female disease; approximately 0.5–1.0% of breast cancers occur in men. TNBC accounts for 10–15% of all breast cancers, but breast cancer in males is hormone receptor-positive in up to 95% of cases, thus male TNBC is particularly rare.                                                                                                                                                                                                                                                                                                                                                                |
| <b>Age</b>                                      | TNBC is associated with younger age of onset than other subtypes. Women aged <40 years have the highest odds of diagnosis.                                                                                                                                                                                                                                                                                                                                                                                                                                                                                                                                  |
| <b>Race/ethnicity</b>                           | TNBC disproportionately affects Black women. The prevalence of TNBC is higher in Black and Hispanic women than in Non-Hispanic White women. An analysis of real-world data from the US reported TNBC in 23% of breast cancers in African-American women vs 12% of White women.                                                                                                                                                                                                                                                                                                                                                                              |
| <b>Geography</b>                                | Generally the incidence is highest in developed regions of the world and lower but increasing in less developed countries. Mortality shows less difference, due in part to earlier detection and improved treatment in more developed countries.                                                                                                                                                                                                                                                                                                                                                                                                            |
| <b>Other considerations</b>                     | Populations enrolled in three large randomized phase 3 trials evaluating immunotherapy in the first-line metastatic TNBC setting enrolled populations comprising 4–7% Black/African-American and 17–30% Asian; however, these figures are strongly influenced by the demographics in participating countries. Underrepresentation in trials limits evaluation of the impact of racial/ethnic- or ancestry-based differences in efficacy and toxicity. The median age in these same three trials was 53–56 years.                                                                                                                                            |
| <b>Overall representativeness of this study</b> | <p>The ranges and percentages in the various small cohorts reported in the present paper are expected to be more diverse given the small patient numbers in each group.</p> <p>Although eligible, no males were enrolled. The age distribution across the various cohorts of our dataset (median 50-56 years) is similar to the average age distribution of TNBC in the literature.</p> <p>Across the various cohorts, the percentage of Black patients was ≤10%. Up to 28% of patients were of multiple/other/mixed race/ethnicity. Patients were enrolled in Europe and North America (plus Australia, South America, and Asia each for two studies).</p> |

**Supplementary Table S2.** Summary of baseline characteristics.

| Characteristic                                     | CO40151                    |               |               | IPATunity130, Cohort C |               |               | IPATunity170   |                       |                         |               |                       |
|----------------------------------------------------|----------------------------|---------------|---------------|------------------------|---------------|---------------|----------------|-----------------------|-------------------------|---------------|-----------------------|
|                                                    | Atezo + ipat + pac/nab-pac |               |               | Atezo + ipat + pac     |               |               | Atezo +<br>pac | Atezo +<br>ipat + pac | Pac                     | ipat +<br>pac | Atezo +<br>ipat + pac |
| Treatment                                          | Atezo + ipat + pac/nab-pac |               |               | Atezo + ipat + pac     |               |               | Atezo +<br>pac | Atezo +<br>ipat + pac | Pac                     | ipat +<br>pac | Atezo +<br>ipat + pac |
| PD-L1 status                                       | +                          | –             | Unknown       | +                      | –             | Unknown       | + (Cohort 2)   |                       | – or unknown (Cohort 1) |               |                       |
| <i>PIK3CA/AKT1/PTEN</i> status                     | Unselected                 |               |               | Not altered            |               |               | Unselected     |                       |                         |               |                       |
| No. of patients                                    | 51                         | 45            | 18            | 40                     | 25            | 37            | 57             | 58                    | 41                      | 43            | 43                    |
| Median age, years (range)                          | 50<br>(29–84)              | 53<br>(27–79) | 51<br>(29–87) | 51<br>(30–83)          | 54<br>(36–72) | 56<br>(22–83) | 52<br>(30–82)  | 52<br>(28–84)         | 53<br>(29–78)           | 52<br>(25–72) | 54<br>(30–81)         |
| Race, %                                            |                            |               |               |                        |               |               |                |                       |                         |               |                       |
| American Indian/Alaska Native                      | 0                          | 2             | 0             | 5                      | 4             | 5             | 11             | 9                     | 2                       | 7             | 12                    |
| Asian                                              | 12                         | 0             | 0             | 13                     | 12            | 11            | 28             | 33                    | 22                      | 16            | 23                    |
| Black/African American                             | 2                          | 0             | 0             | 10                     | 8             | 8             | 4              | 3                     | 0                       | 5             | 5                     |
| White                                              | 75                         | 87            | 72            | 50                     | 60            | 54            | 56             | 50                    | 71                      | 67            | 60                    |
| Multiple/other/unknown                             | 12                         | 11            | 28            | 23                     | 16            | 22            | 2              | 5                     | 5                       | 5             | 0                     |
| ECOG PS status 0, %                                | 45                         | 53            | 61            | 58                     | 60            | 62            | 74             | 53                    | 63                      | 67            | 60                    |
| Prior (neo)adjuvant chemotherapy, %                | 69                         | 62            | 78            | 35                     | 60            | 35            | 51             | 40                    | 63                      | 58            | 58                    |
| Anthracycline                                      | 57                         | 49            | 56            | 33                     | 52            | 27            | 40             | 31                    | 32                      | 44            | 51                    |
| Taxane                                             | 55                         | 53            | 56            | 28                     | 56            | 35            | 30             | 31                    | 49                      | 49            | 44                    |
| <i>PIK3CA/AKT1/PTEN</i> alteration, % <sup>a</sup> |                            |               |               |                        |               |               |                |                       |                         |               |                       |
| Altered                                            | 31                         |               |               | 0                      | 0             | 0             | 44             | 34                    | 34                      | 30            | 53                    |
| <i>PIK3CA/AKT1</i>                                 |                            |               |               | 0                      | 0             | 0             | 23             | 10                    | 22                      | 16            | 19                    |

| Characteristic                       | CO40151 |     |     | IPATunity130, Cohort C |     |     | IPATunity170 |     |    |    |    |
|--------------------------------------|---------|-----|-----|------------------------|-----|-----|--------------|-----|----|----|----|
| PTEN only                            |         |     |     | 0                      | 0   | 0   | 21           | 24  | 12 | 14 | 35 |
| Not altered                          | 39      |     |     | 100                    | 100 | 100 | 47           | 59  | 41 | 51 | 30 |
| Unknown                              | 29      |     |     | 0                      | 0   | 0   | 9            | 7   | 24 | 19 | 16 |
| PD-L1 status, %                      |         |     |     |                        |     |     |              |     |    |    |    |
| Positive                             | 100     | 0   | 0   | 100                    | 0   | 0   | 100          | 100 | 0  | 0  | 0  |
| Negative                             | 0       | 100 | 0   | 0                      | 100 | 0   | 0            | 0   | 95 | 98 | 86 |
| Unknown                              | 0       | 0   | 100 | 0                      | 0   | 100 | 0            | 0   | 5  | 2  | 14 |
| BRCA mutation status, % <sup>b</sup> |         |     |     |                        |     |     |              |     |    |    |    |
| Negative                             | NA      | NA  | NA  | 85                     | 80  | 84  | 75           | 81  | 66 | 72 | 63 |
| Positive                             | NA      | NA  | NA  | 15                     | 20  | 16  | 16           | 12  | 10 | 9  | 21 |
| Unknown                              | NA      | NA  | NA  | 0                      | 0   | 0   | 9            | 7   | 24 | 19 | 16 |

<sup>a</sup>By central testing.

<sup>b</sup>By local testing before enrollment. Not collected in CO40151.

Abbreviations: atezo, atezolizumab; ipat, ipatasertib; NA, not available, pac, paclitaxel; PS, performance status.

**Supplementary Table S3.** Summary of treatment exposure (triplet regimens shown in bold).

| Characteristic                            | CO40151                                 |                                            |                                         | IPATunity130, Cohort C      |    |         | IPATunity170         |                             |                      |                      |                             |
|-------------------------------------------|-----------------------------------------|--------------------------------------------|-----------------------------------------|-----------------------------|----|---------|----------------------|-----------------------------|----------------------|----------------------|-----------------------------|
|                                           | +                                       | –                                          | Unknown                                 | +                           | –  | Unknown | +                    | –                           | – or unknown         | – or unknown         | – or unknown                |
| PD-L1 status                              | +                                       | –                                          | Unknown                                 | +                           | –  | Unknown | +                    | –                           | – or unknown         | – or unknown         | – or unknown                |
| <i>PIK3CA/AKT1/PTEN</i> status            | Unselected                              |                                            |                                         | Not altered                 |    |         |                      |                             |                      |                      |                             |
| Treatment                                 | <b>Atezo + ipat + pac/nab-pac</b>       |                                            |                                         | <b>Atezo + ipat + pac</b>   |    |         | <b>Atezo + pac</b>   | <b>Atezo + ipat + pac</b>   | <b>Pac</b>           | <b>Ipat + pac</b>    | <b>Atezo + ipat + pac</b>   |
| No. of patients                           | <b>51</b>                               | <b>45</b>                                  | <b>18</b>                               | 40                          | 25 | 37      | 57                   | <b>58</b>                   | 41                   | 43                   | <b>43</b>                   |
| Median treatment duration, months (range) |                                         |                                            |                                         |                             |    |         |                      |                             |                      |                      |                             |
| Paclitaxel                                | <b>(n = 38)</b><br>5.1<br><b>(0–21)</b> | <b>(n = 40)</b><br>5.1<br><b>(1–17)</b>    | <b>(n = 16)</b><br>4.7<br><b>(1–15)</b> | <b>6.1</b><br><b>(0–25)</b> |    |         | 3.3<br><b>(0–20)</b> | <b>4.9</b><br><b>(0–16)</b> | 3.2<br><b>(0–17)</b> | 3.7<br><b>(0–15)</b> | <b>4.7</b><br><b>(0–17)</b> |
| Nab-paclitaxel                            | <b>(n = 13)</b><br>5.1<br><b>(0–9)</b>  | <b>(n = 5)</b><br>3.3<br><b>(&lt;1–11)</b> | <b>(n = 2)</b><br>5.4<br><b>(5–6)</b>   | –                           | –  | –       | –                    | –                           | –                    | –                    | –                           |
| Ipatasertib                               | 7.1<br><b>(0–42)</b>                    | 6.7<br><b>(1–44)</b>                       | 7.3<br><b>(0–37)</b>                    | 6.2<br><b>(0–28)</b>        |    |         | –                    | <b>5.3</b><br><b>(0–19)</b> | –                    | 3.5<br><b>(0–16)</b> | <b>3.9</b><br><b>(0–18)</b> |
| Atezolizumab                              | 6.0<br><b>(0–38)</b>                    | 6.5<br><b>(0–43)</b>                       | 7.3<br><b>(0–38)</b>                    | 5.7<br><b>(0–27)</b>        |    |         | 3.3<br><b>(0–20)</b> | <b>5.1</b><br><b>(0–19)</b> | –                    | –                    | <b>5.1</b><br><b>(0–18)</b> |

Abbreviations: atezo, atezolizumab; ipat, ipatasertib; pac, paclitaxel.

**Supplementary Table S4.** Grade ≥3 AEs<sup>a</sup> in >5% of patients receiving the triplet regimen in any trial.

| Trial                      | CO40151                                           | IPATunity130, Cohort C                     | IPATunity170                                        |                                                     | All trials ( <i>n</i> = 317) |
|----------------------------|---------------------------------------------------|--------------------------------------------|-----------------------------------------------------|-----------------------------------------------------|------------------------------|
| Treatment                  | <b>Atezo + ipat +pac/nab-pac (<i>n</i> = 114)</b> | <b>Atezo + ipat + pac (<i>n</i> = 102)</b> | <b>Cohort 1, Atezo + ipat + pac (<i>n</i> = 43)</b> | <b>Cohort 2, Atezo + ipat + pac (<i>n</i> = 58)</b> |                              |
| Diarrhea                   | 14 (12)                                           | 17 (17)                                    | 6 (14)                                              | 8 (14)                                              | 45 (14)                      |
| Rash                       | 11 (10)                                           | 2 (2)                                      | 5 (12)                                              | 3 (5)                                               | 21 (7)                       |
| Neutropenia                | 12 (11)                                           | 6 (6)                                      | 5 (12)                                              | 5 (9)                                               | 28 (9)                       |
| Neutrophil count decreased | 1 (1)                                             | 4 (4)                                      | 2 (5)                                               | 3 (5)                                               | 10 (3)                       |
| ALT increased              | 7 (6)                                             | 8 (8)                                      | 2 (5)                                               | 7 (12)                                              | 24 (8)                       |
| AST increased              | 4 (4)                                             | 8 (8)                                      | 1 (2)                                               | 6 (10)                                              | 19 (6)                       |
| Peripheral neuropathy      | 2 (2)                                             | 7 (7)                                      | 1 (2)                                               | 1 (2)                                               | 11 (3)                       |
| Lipase increased           | 6 (5)                                             | 3 (3)                                      | 0                                                   | 2 (3)                                               | 11 (3)                       |
| Fatigue                    | 0                                                 | 3 (3)                                      | 2 (5)                                               | 3 (5)                                               | 8 (3)                        |
| Syncope                    | 1 (1)                                             | 0                                          | 0                                                   | 3 (5)                                               | 4 (1)                        |

<sup>a</sup>AEs graded according to NCI CTCAE version 4.0 for CO40151 and IPATunity130 and version 5.0 for IPATunity170 and coded using MedDRA version 24.1.

Abbreviations: AE, adverse event; atezo, atezolizumab; ipat, ipatasertib; MedDRA, Medical Dictionary for Regulatory Activities; NCI CTCAE, National Cancer Institute Common Terminology Criteria for Adverse Events; pac, paclitaxel.

**Supplementary Table S5.** Results of GSEA analysis with hallmark gene sets.

| Gene set ID                                        | No. of genes in the gene set | Median t statistics | Regulation direction of pathways | Enrichment score | Normalized enrichment score | P value               | Adjusted P value      |
|----------------------------------------------------|------------------------------|---------------------|----------------------------------|------------------|-----------------------------|-----------------------|-----------------------|
| Hallmark E2F targets                               | 200                          | -1.45               | Down                             | -0.65            | -3.09                       | $3.6 \times 10^{-35}$ | $1.8 \times 10^{-33}$ |
| Hallmark G2M checkpoint                            | 200                          | -1.41               | Down                             | -0.59            | -2.8                        | $5.5 \times 10^{-25}$ | $1.4 \times 10^{-23}$ |
| Hallmark IFN gamma response                        | 191                          | 0.84                | Up                               | 0.55             | 2.93                        | $9.7 \times 10^{-24}$ | $1.6 \times 10^{-22}$ |
| Hallmark MYC targets V1                            | 195                          | -1.06               | Down                             | -0.58            | -2.75                       | $4.1 \times 10^{-23}$ | $5.2 \times 10^{-22}$ |
| Hallmark TNF $\alpha$ signaling via NF- $\kappa$ B | 190                          | 0.6                 | Up                               | 0.46             | 2.42                        | $1.8 \times 10^{-13}$ | $1.8 \times 10^{-12}$ |
| Hallmark IFN alpha response                        | 95                           | 0.91                | Up                               | 0.57             | 2.69                        | $3.0 \times 10^{-13}$ | $2.5 \times 10^{-12}$ |
| Hallmark epithelial–mesenchymal transition         | 195                          | 0.65                | Up                               | 0.43             | 2.26                        | $1.8 \times 10^{-11}$ | $1.3 \times 10^{-10}$ |
| Hallmark oxidative phosphorylation                 | 198                          | -0.61               | Down                             | -0.45            | -2.13                       | $7.6 \times 10^{-10}$ | $4.8 \times 10^{-9}$  |
| Hallmark allograft rejection                       | 171                          | 0.49                | Up                               | 0.41             | 2.14                        | $1.3 \times 10^{-8}$  | $7.5 \times 10^{-8}$  |
| Hallmark androgen response                         | 97                           | 0.8                 | Up                               | 0.48             | 2.25                        | $3.1 \times 10^{-8}$  | $1.6 \times 10^{-7}$  |
| Hallmark complement                                | 176                          | 0.46                | Up                               | 0.38             | 1.99                        | $1.4 \times 10^{-7}$  | $6.5 \times 10^{-7}$  |
| Hallmark mitotic spindle                           | 199                          | -0.55               | Down                             | -0.41            | -1.94                       | $1.6 \times 10^{-7}$  | $6.9 \times 10^{-7}$  |
| Hallmark inflammatory response                     | 172                          | 0.45                | Up                               | 0.37             | 1.89                        | $6.5 \times 10^{-7}$  | $2.5 \times 10^{-6}$  |
| Hallmark MYC targets V2                            | 56                           | -1.09               | Down                             | -0.57            | -2.21                       | $9.7 \times 10^{-7}$  | $3.5 \times 10^{-6}$  |
| Hallmark protein secretion                         | 94                           | 0.41                | Up                               | 0.43             | 2.02                        | $6.0 \times 10^{-6}$  | $2.0 \times 10^{-5}$  |
| Hallmark apoptosis                                 | 156                          | 0.45                | Up                               | 0.34             | 1.74                        | $3.0 \times 10^{-5}$  | $9.4 \times 10^{-5}$  |
| Hallmark IL2 STAT5 signaling                       | 185                          | 0.42                | Up                               | 0.33             | 1.73                        | $3.9 \times 10^{-5}$  | 0.00012               |
| Hallmark IL6 JAK STAT3 signaling                   | 76                           | 0.48                | Up                               | 0.42             | 1.89                        | 0.00015               | 0.00043               |
| Hallmark DNA repair                                | 142                          | -0.47               | Down                             | -0.38            | -1.76                       | 0.00023               | 0.00060               |
| Hallmark UV response DN                            | 142                          | 0.24                | Up                               | 0.29             | 1.47                        | 0.0051                | 0.013                 |
| Hallmark hypoxia                                   | 180                          | 0.23                | Up                               | 0.27             | 1.39                        | 0.011                 | 0.025                 |
| Hallmark spermatogenesis                           | 79                           | -0.52               | Down                             | -0.38            | -1.58                       | 0.013                 | 0.030                 |
| Hallmark glycolysis                                | 179                          | -0.17               | Down                             | -0.29            | -1.37                       | 0.030                 | 0.065                 |
| Hallmark estrogen response late                    | 180                          | -0.11               | Down                             | -0.28            | -1.34                       | 0.037                 | 0.077                 |
| Hallmark coagulation                               | 105                          | 0.45                | Up                               | 0.28             | 1.33                        | 0.043                 | 0.086                 |
| Hallmark xenobiotic metabolism                     | 158                          | 0.05                | Up                               | 0.25             | 1.25                        | 0.051                 | 0.098                 |

| <b>Gene set ID</b>                       | <b>No. of genes in the gene set</b> | <b>Median t statistics</b> | <b>Regulation direction of pathways</b> | <b>Enrichment score</b> | <b>Normalized enrichment score</b> | <b>P value</b> | <b>Adjusted P value</b> |
|------------------------------------------|-------------------------------------|----------------------------|-----------------------------------------|-------------------------|------------------------------------|----------------|-------------------------|
| Hallmark estrogen response early         | 189                                 | 0.17                       | Up                                      | 0.24                    | 1.25                               | 0.057          | 0.11                    |
| Hallmark mTORC1 signaling                | 196                                 | -0.3                       | Down                                    | -0.27                   | -1.27                              | 0.067          | 0.12                    |
| Hallmark KRAS signaling up               | 170                                 | 0.24                       | Up                                      | 0.23                    | 1.2                                | 0.078          | 0.13                    |
| Hallmark TGF BETA signaling              | 52                                  | 0.09                       | Up                                      | 0.3                     | 1.23                               | 0.14           | 0.23                    |
| Hallmark WNT BETA catenin signaling      | 38                                  | -0.17                      | Down                                    | -0.35                   | -1.26                              | 0.16           | 0.26                    |
| Hallmark heme metabolism                 | 173                                 | 0.09                       | Up                                      | 0.22                    | 1.12                               | 0.18           | 0.29                    |
| Hallmark angiogenesis                    | 28                                  | 0.25                       | Up                                      | 0.32                    | 1.14                               | 0.27           | 0.38                    |
| Hallmark apical surface                  | 35                                  | 0.03                       | Up                                      | 0.3                     | 1.13                               | 0.27           | 0.38                    |
| Hallmark bile acid metabolism            | 87                                  | 0.02                       | Down                                    | -0.26                   | -1.11                              | 0.27           | 0.38                    |
| Hallmark apical junction                 | 177                                 | 0.13                       | Up                                      | 0.2                     | 1.06                               | 0.29           | 0.40                    |
| Hallmark NOTCH signaling                 | 32                                  | 0.37                       | Down                                    | -0.33                   | -1.12                              | 0.30           | 0.40                    |
| Hallmark myogenesis                      | 156                                 | 0.1                        | Up                                      | 0.21                    | 1.04                               | 0.33           | 0.43                    |
| Hallmark unfolded protein response       | 110                                 | 0.04                       | Up                                      | 0.22                    | 1.05                               | 0.34           | 0.44                    |
| Hallmark UV RESPONSE UP                  | 143                                 | -0.19                      | Down                                    | -0.23                   | -1.04                              | 0.35           | 0.44                    |
| Hallmark adipogenesis                    | 191                                 | -0.03                      | Down                                    | -0.22                   | -1.04                              | 0.38           | 0.46                    |
| Hallmark pancreas beta cells             | 17                                  | -0.48                      | Down                                    | -0.31                   | -0.94                              | 0.55           | 0.65                    |
| Hallmark P53 pathway                     | 192                                 | -0.03                      | Down                                    | -0.2                    | -0.94                              | 0.58           | 0.67                    |
| Hallmark peroxisome                      | 93                                  | -0.05                      | Down                                    | -0.21                   | -0.92                              | 0.64           | 0.73                    |
| Hallmark cholesterol homeostasis         | 71                                  | 0.11                       | Up                                      | 0.19                    | 0.86                               | 0.78           | 0.85                    |
| Hallmark fatty acid metabolism           | 138                                 | 0.04                       | Down                                    | -0.19                   | -0.85                              | 0.79           | 0.85                    |
| Hallmark HEDGEHOG signaling              | 31                                  | 0.08                       | Up                                      | 0.21                    | 0.76                               | 0.86           | 0.90                    |
| Hallmark KRAS signaling DN               | 117                                 | 0.05                       | Down                                    | -0.19                   | -0.82                              | 0.86           | 0.90                    |
| Hallmark reactive oxygen species pathway | 47                                  | 0                          | Down                                    | -0.19                   | -0.72                              | 0.91           | 0.91                    |
| Hallmark PI3K AKT mTOR signaling         | 98                                  | -0.12                      | Down                                    | -0.18                   | -0.77                              | 0.91           | 0.91                    |

Abbreviations: DGE, differential gene expression; JAK, Janus kinase.

### Supplementary Figure S1.

Trial designs of **A**, CO40151; **B**, IPATunity130; **C**, IPATunity170.

atezo, atezolizumab; CBR, clinical benefit rate; CIT, cancer immunotherapy; CTA, clinical trial assay; D, day; DoR, duration of response; EBC, early breast cancer; FMI, Foundation Medicine, Inc.; GHS/HRQoL, global health status/health-related quality of life; ipat, ipatasertib; HR+, hormone receptor positive; ITT, intent-to-treat; IV, intravenous; LA/MBC, locally advanced/metastatic breast cancer; pac, paclitaxel; PRO, patient-reported outcome; R, randomization.

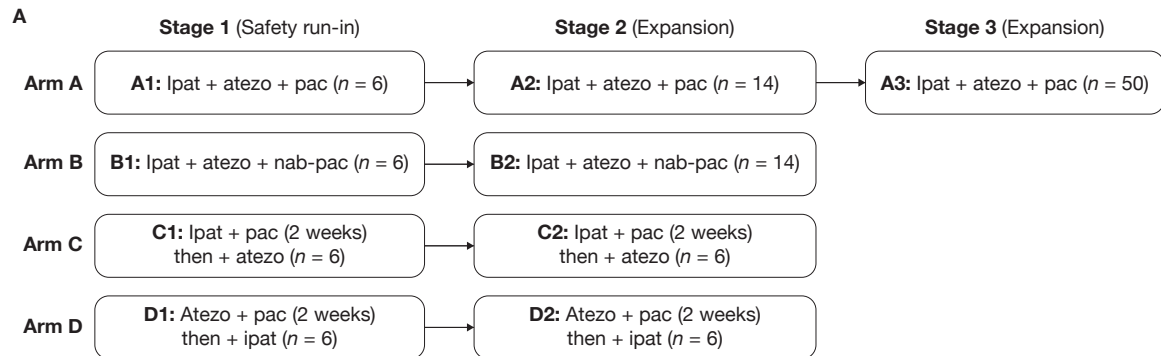

Patients were enrolled in the following order: A1 → B1 → A2 → B2/C1 → D1 → C2 → D2 → A3. Both Arms B2 and Arms C or D were open simultaneously, but priority for filling of arms went to Arms C and D. Arms C and D included a 2-week run-in period during which patients received a doublet, with the third agent added at week 3.



**B**

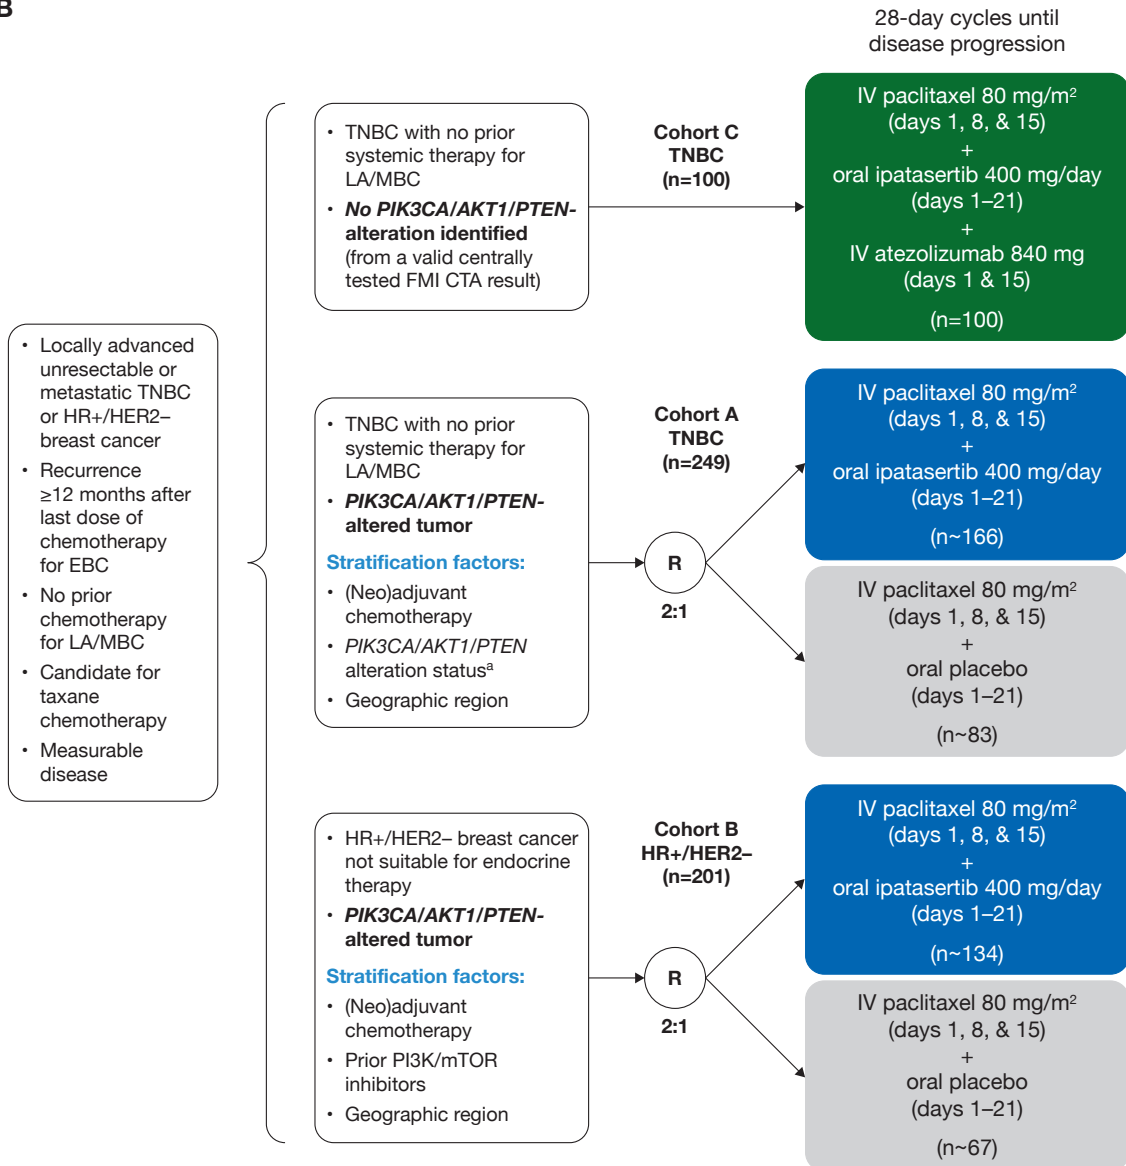

<sup>a</sup>*PIK3CA/AKT1* mutant versus *PTEN* altered (and non-*PIK3CA/AKT1* mutant).

C

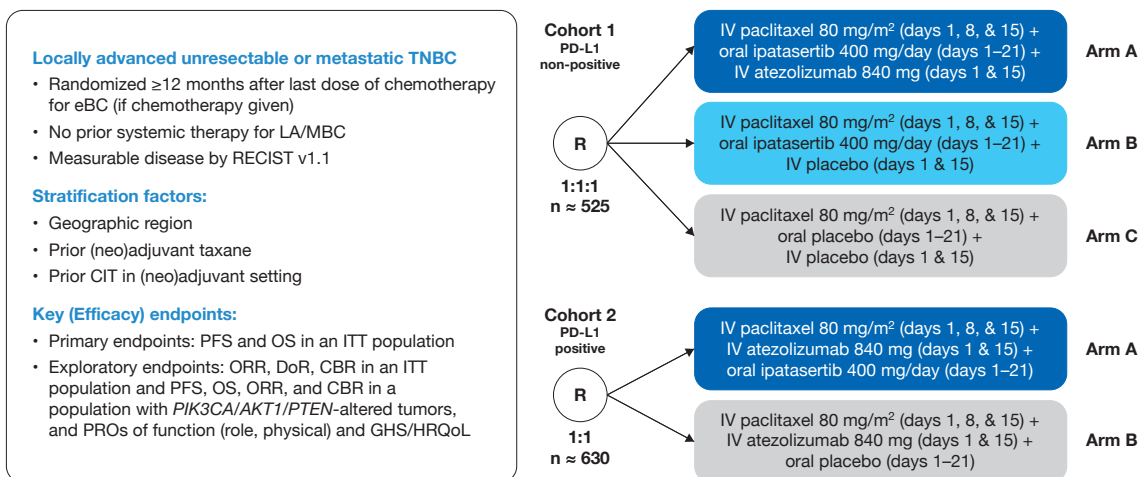

After unblinding of treatment assignments, patients in Arm B of Cohort 2 no longer received placebo for ipatasertib, patients in Arm B of Cohort 1 no longer received placebo for atezolizumab, and patients in Arm C of Cohort 1 no longer received placebo for ipatasertib nor placebo for atezolizumab.

### Supplementary Figure S2.

Development and validation of pAKT model using FAIRLANE and LOTUS datasets. **A**, Selection of variables. **B**, Accuracy against the number of genes included in the model. **C**, True positive against false positive fractions. **D**, Representative example of a random forest tree from which pAKT was scored according to gene expression level. **E**, Validation using a subset of data from FAIRLANE. **F**, Validation applying the model to the LOTUS dataset in the control arm (paclitaxel plus placebo; left graph) and the experimental arm (ipatasertib plus paclitaxel; right graph).

atezo, atezolizumab; AUC, area under the curve; ipat, ipatasertib; OOB, out-of-bag; pac, paclitaxel.

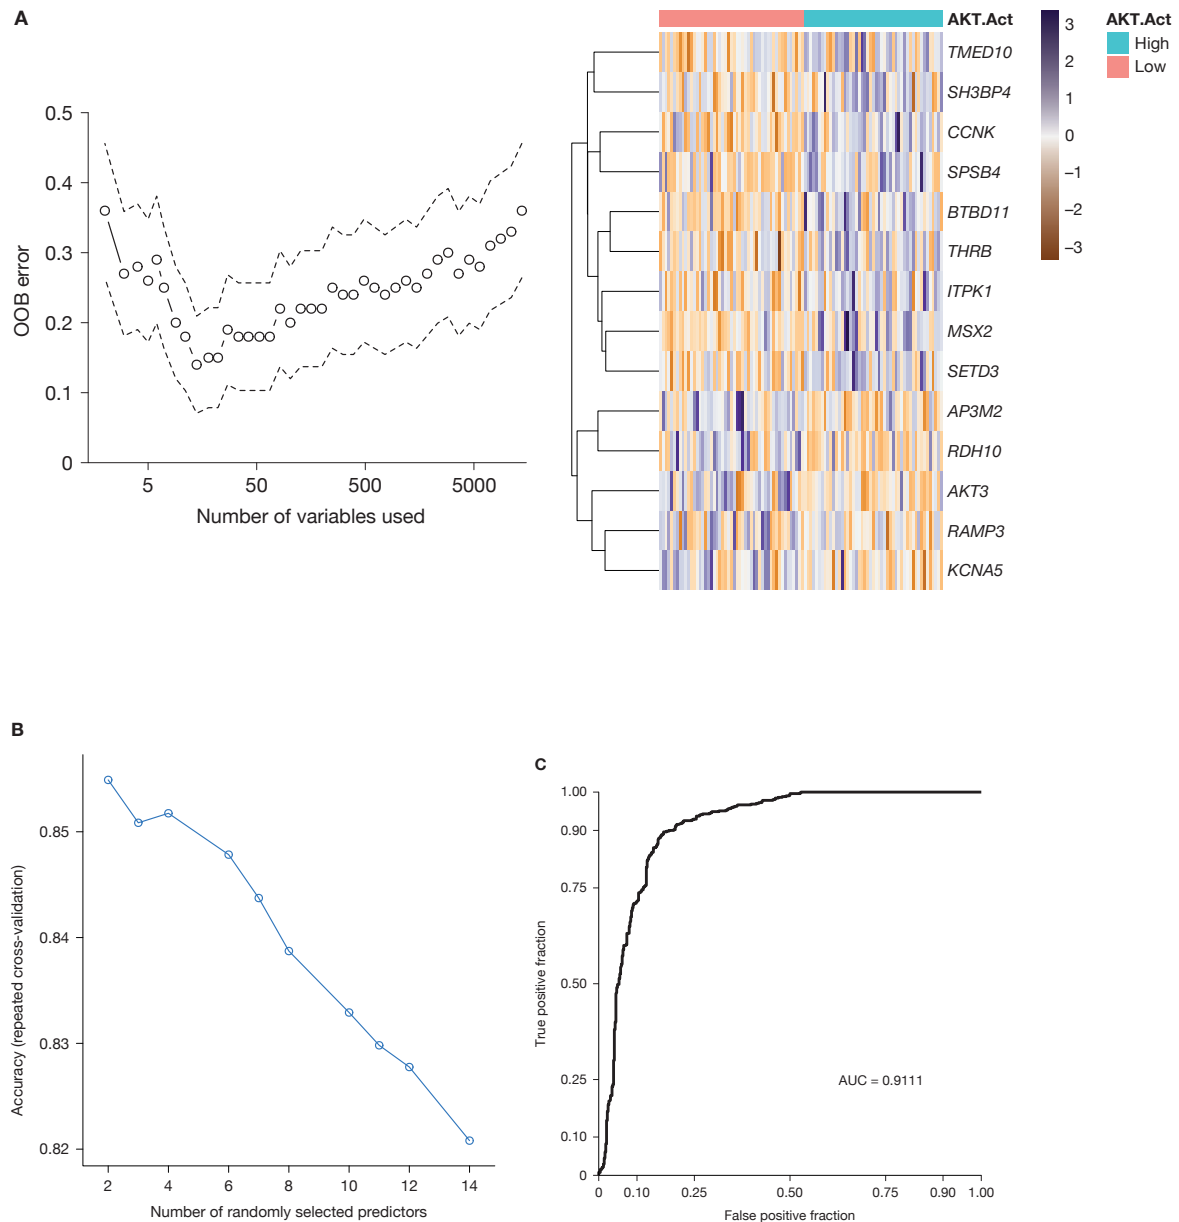

D

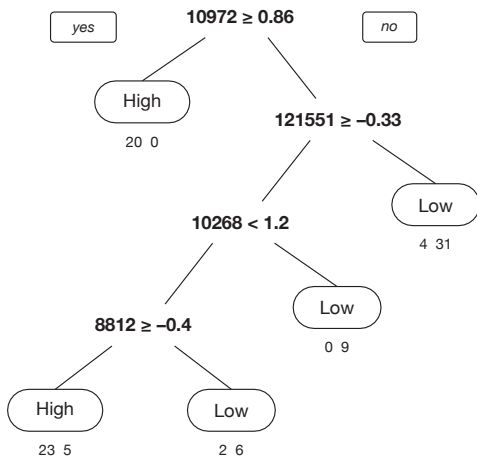

E

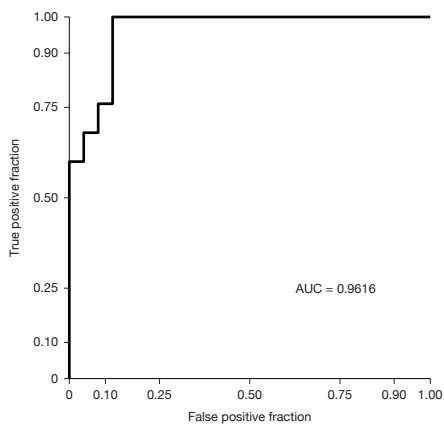

|                    | > median | ≤ median |
|--------------------|----------|----------|
| Predicted > median | 22       | 0        |
| Predicted ≤ median | 3        | 25       |

F

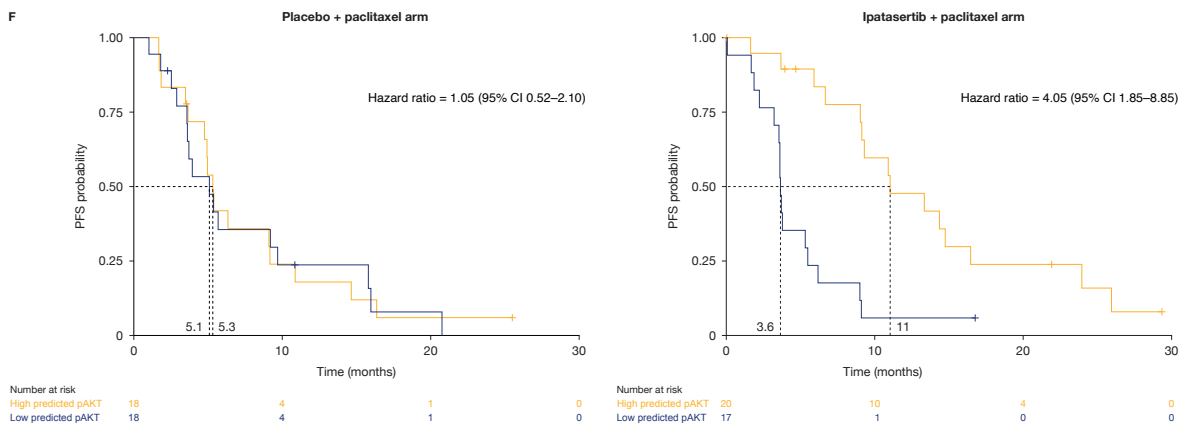

**Supplementary Figure S3.**

Efficacy by taxane backbone and PD-L1 status in CO40151. **A**, PFS by taxane. **B**, OS by taxane. **C**, PFS by PD-L1 status. **D**, OS by PD-L1 status. atezo, atezolizumab; ipat, ipatasertib; pac, paclitaxel.

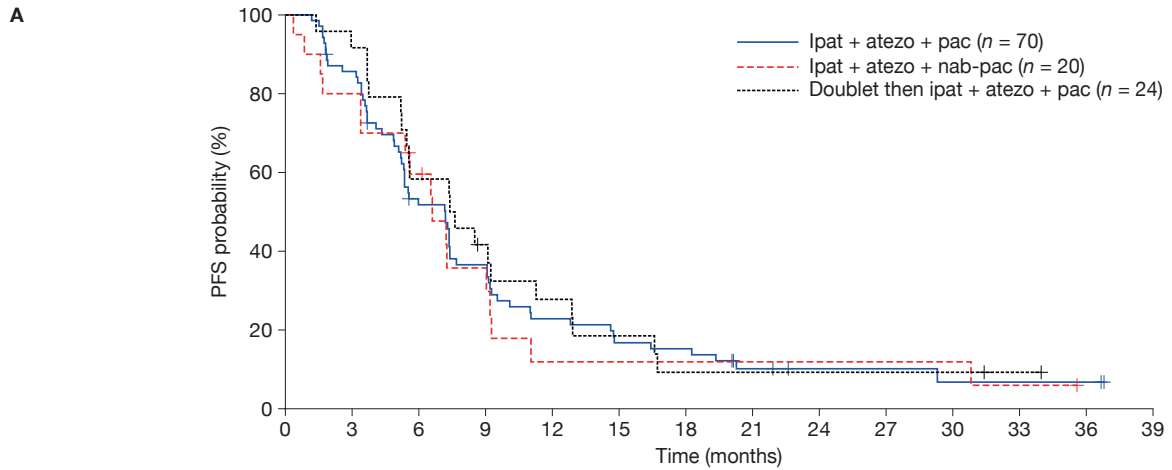

| Number at risk                  | 0  | 3  | 6  | 9  | 12 | 15 | 18 | 21 | 24 | 27 | 30 | 33 | 36 | 39 |
|---------------------------------|----|----|----|----|----|----|----|----|----|----|----|----|----|----|
| Ipat + atezo + pac              | 70 | 59 | 34 | 24 | 15 | 11 | 10 | 5  | 3  | 3  | 2  | 2  | 2  | 0  |
| Ipat + atezo + nab-pac          | 20 | 16 | 11 | 6  | 2  | 2  | 2  | 2  | 2  | 2  | 2  | 1  | 0  | 0  |
| Doublet then ipat + atezo + pac | 24 | 22 | 14 | 9  | 6  | 4  | 2  | 2  | 2  | 2  | 2  | 1  | 0  | 0  |

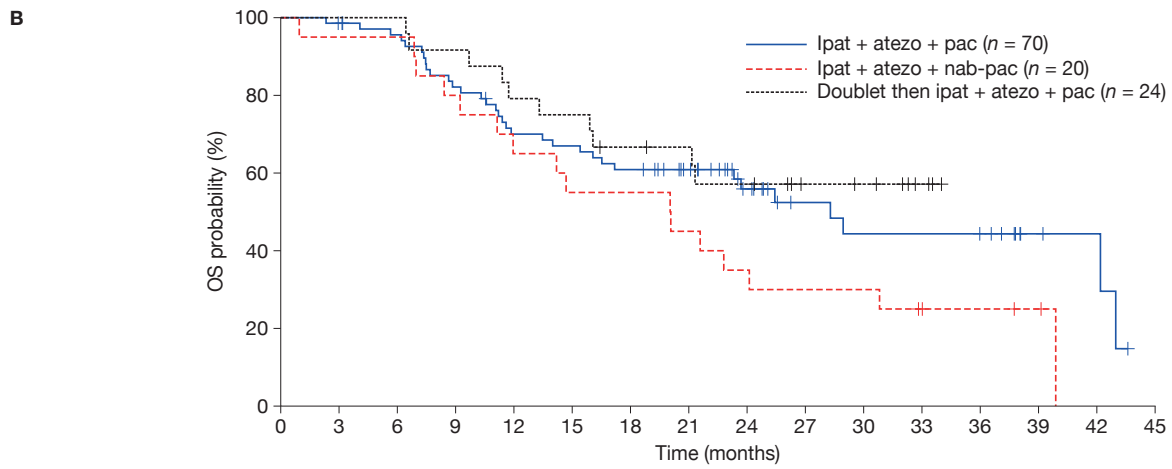

| Number at risk                  | 0  | 3  | 6  | 9  | 12 | 15 | 18 | 21 | 24 | 27 | 30 | 33 | 36 | 39 | 42 | 45 |
|---------------------------------|----|----|----|----|----|----|----|----|----|----|----|----|----|----|----|----|
| Ipat + atezo + pac              | 70 | 68 | 64 | 55 | 46 | 44 | 40 | 33 | 21 | 13 | 11 | 11 | 10 | 4  | 3  | 0  |
| Ipat + atezo + nab-pac          | 20 | 19 | 19 | 16 | 13 | 11 | 11 | 9  | 7  | 6  | 6  | 4  | 3  | 2  | 0  | 0  |
| Doublet then ipat + atezo + pac | 24 | 24 | 24 | 22 | 19 | 18 | 15 | 14 | 12 | 8  | 7  | 3  | 0  | 0  | 0  | 0  |

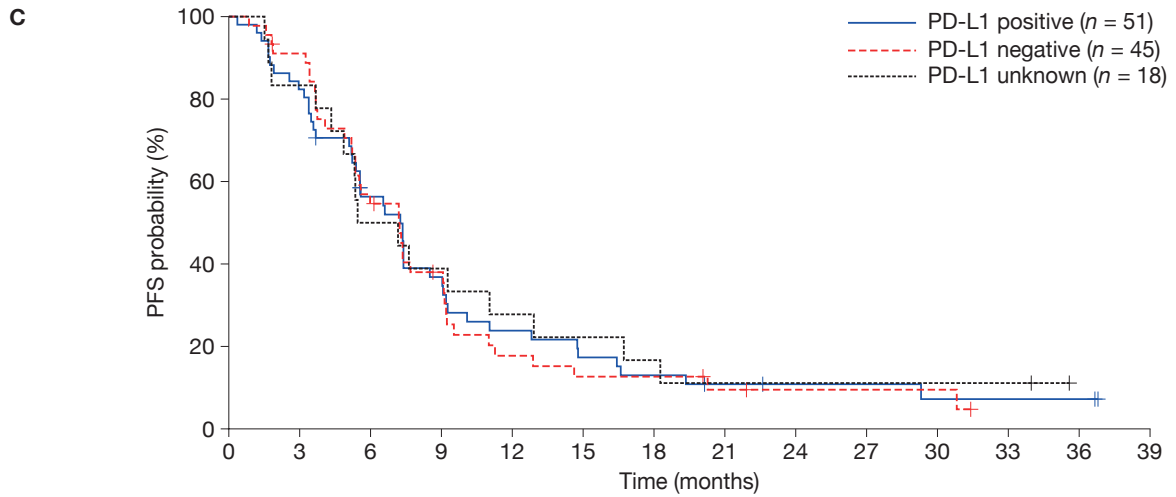

| Number at risk | 0  | 3  | 6  | 9  | 12 | 15 | 18 | 21 | 24 | 27 | 30 | 33 | 36 | 39 |
|----------------|----|----|----|----|----|----|----|----|----|----|----|----|----|----|
| PD-L1 positive | 51 | 42 | 26 | 17 | 11 | 8  | 6  | 4  | 3  | 3  | 2  | 2  | 2  | 0  |
| PD-L1 negative | 45 | 40 | 24 | 15 | 7  | 5  | 5  | 3  | 2  | 2  | 2  | 0  | 0  | 0  |
| PD-L1 unknown  | 18 | 15 | 9  | 7  | 5  | 4  | 3  | 2  | 2  | 2  | 2  | 2  | 0  | 0  |

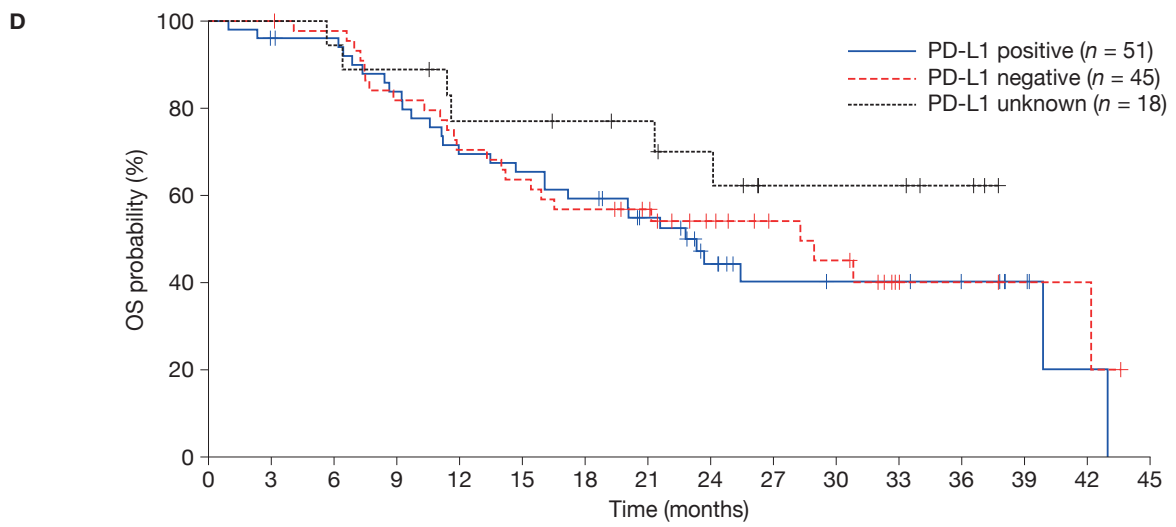

| Number at risk | 0  | 3  | 6  | 9  | 12 | 15 | 18 | 21 | 24 | 27 | 30 | 33 | 36 | 39 | 42 | 45 |
|----------------|----|----|----|----|----|----|----|----|----|----|----|----|----|----|----|----|
| PD-L1 positive | 51 | 48 | 47 | 41 | 34 | 32 | 29 | 23 | 15 | 10 | 9  | 9  | 7  | 4  | 1  | 0  |
| PD-L1 negative | 45 | 45 | 43 | 36 | 31 | 28 | 25 | 22 | 16 | 12 | 10 | 4  | 3  | 2  | 2  | 0  |
| PD-L1 unknown  | 18 | 18 | 17 | 16 | 13 | 13 | 12 | 11 | 9  | 5  | 5  | 5  | 3  | 0  | 0  | 0  |

**Supplementary Figure S4.**

Efficacy in IPATunity130 Cohort C (*PIK3CA/AKT1/PTEN* non-altered). **A**, PFS in all patients. **B**, PFS by PD-L1 status. **C**, OS in all patients. atezo, atezolizumab; ipat, ipatasertib; pac, paclitaxel.

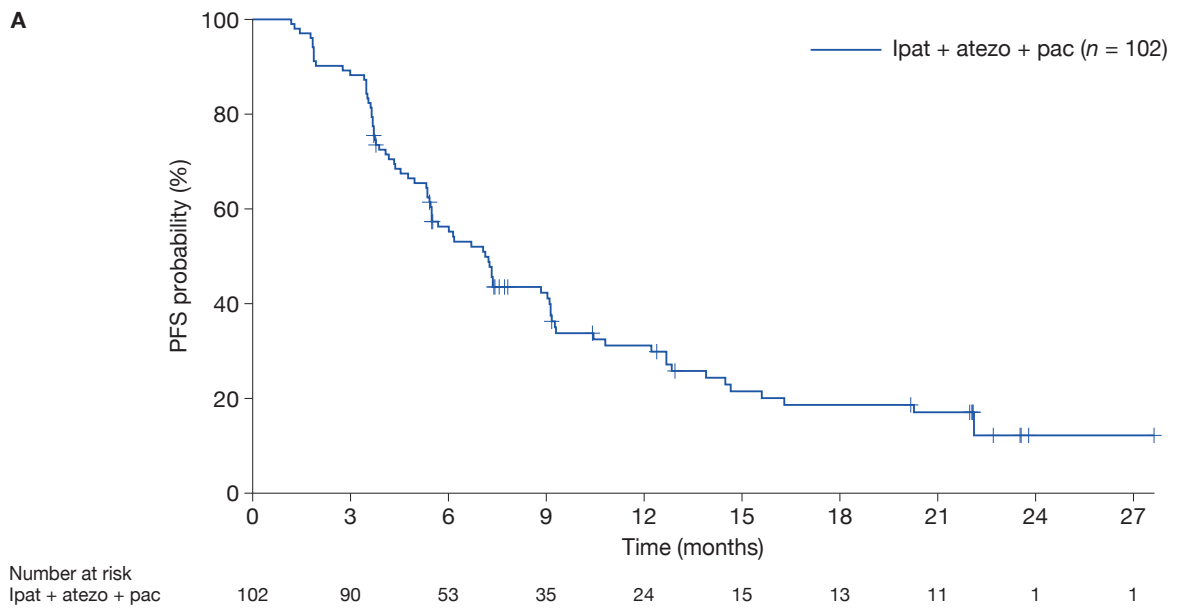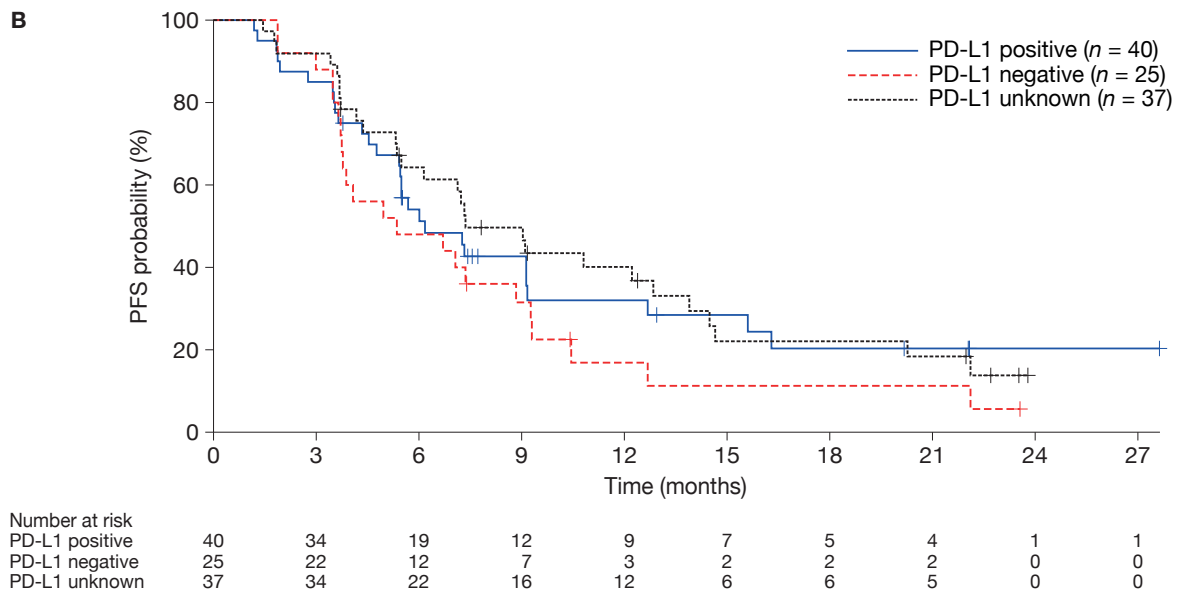

C

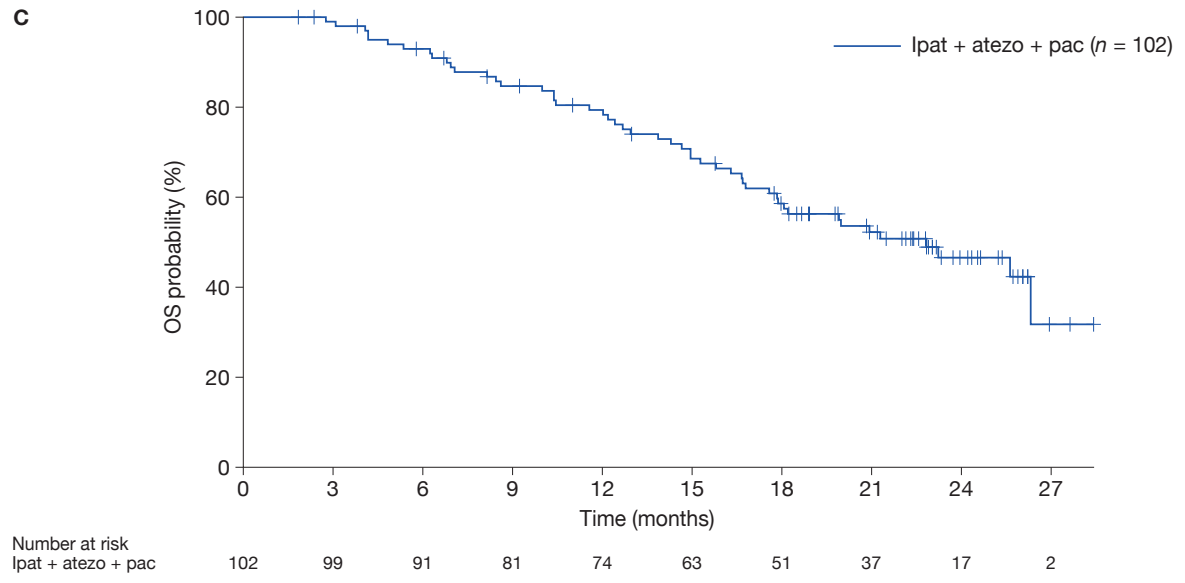



**Supplementary Figure S5.**

Efficacy by cohort (PD-L1 status) and treatment arm in IPATunity170. **A**, PFS in Cohort 2 (PD-L1-positive). **B**, OS in Cohort 2 (PD-L1-positive). **C**, PFS in Cohort 1 (PD-L1-negative/unknown). **D**, OS in Cohort 1 (PD-L1-negative/unknown). atezo, atezolizumab; ipat, ipatasertib; pac, paclitaxel.

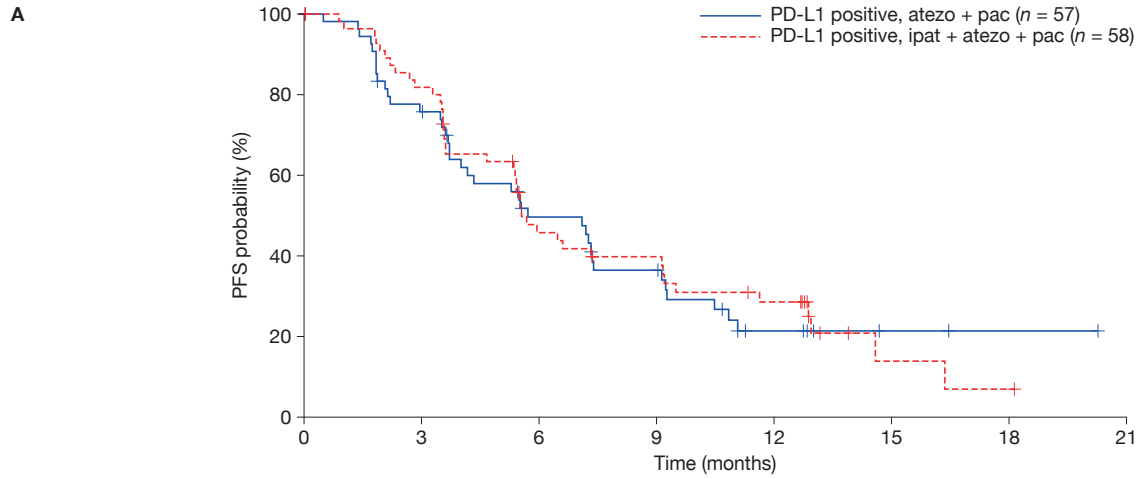

| Number at risk                     |    | 0  | 3  | 6  | 9  | 12 | 15 | 18 | 21 |
|------------------------------------|----|----|----|----|----|----|----|----|----|
| PD-L1 positive, atezo + pac        | 57 | 40 | 23 | 16 | 6  | 2  | 1  | 0  | 0  |
| PD-L1 positive, ipat + atezo + pac | 58 | 45 | 23 | 18 | 12 | 2  | 1  | 0  | 0  |

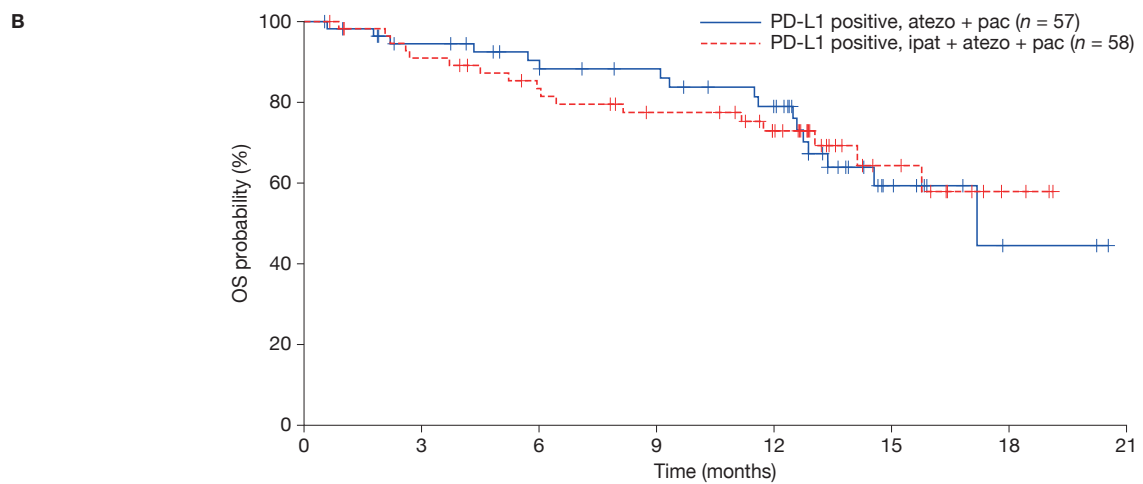

| Number at risk                     |    | 0  | 3  | 6  | 9  | 12 | 15 | 18 | 21 |
|------------------------------------|----|----|----|----|----|----|----|----|----|
| PD-L1 positive, atezo + pac        | 57 | 49 | 43 | 39 | 32 | 10 | 2  | 0  | 0  |
| PD-L1 positive, ipat + atezo + pac | 58 | 50 | 43 | 37 | 29 | 11 | 3  | 0  | 0  |

**C**

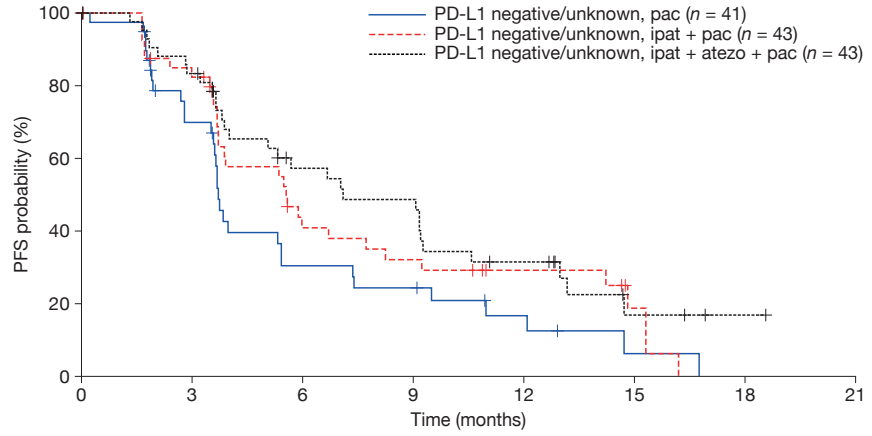

| Number at risk                             | 0  | 3  | 6  | 9  | 12 | 15 | 18 | 21 |
|--------------------------------------------|----|----|----|----|----|----|----|----|
| PD-L1 negative/unknown, pac                | 41 | 24 | 10 | 8  | 4  | 1  | 0  | 0  |
| PD-L1 negative/unknown, ipat + pac         | 43 | 32 | 14 | 11 | 7  | 3  | 0  | 0  |
| PD-L1 negative/unknown, ipat + atezo + pac | 43 | 35 | 20 | 17 | 10 | 3  | 1  | 0  |

**D**

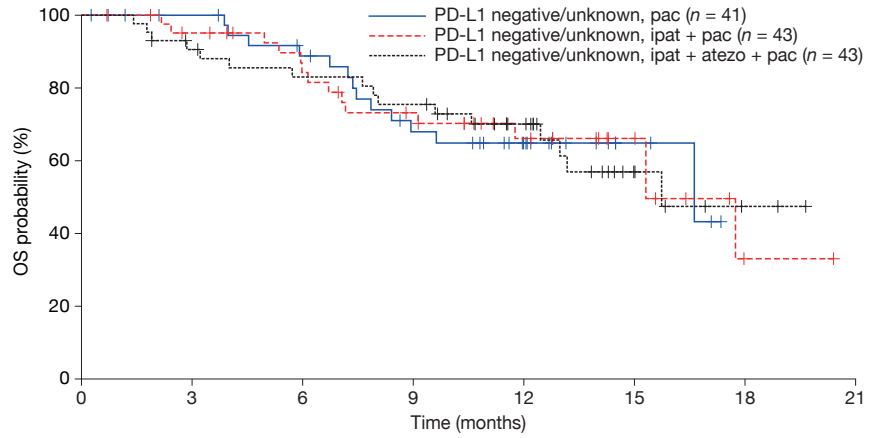

| Number at risk                             | 0  | 3  | 6  | 9  | 12 | 15 | 18 | 21 |
|--------------------------------------------|----|----|----|----|----|----|----|----|
| PD-L1 negative/unknown, pac                | 41 | 37 | 31 | 22 | 14 | 4  | 0  | 0  |
| PD-L1 negative/unknown, ipat + pac         | 43 | 38 | 31 | 25 | 16 | 9  | 1  | 0  |
| PD-L1 negative/unknown, ipat + atezo + pac | 43 | 37 | 33 | 30 | 21 | 7  | 2  | 0  |

### Supplementary Figure S6.

PD-L1 level according to predicted pAKT level and response status, with PD-L1 status assessed by: **A**, 22C3; **B**, SP142. The lower and upper bounds of the rectangles represent the first and third quartiles, the horizontal line represents the median, the whiskers extend to the highest and lowest values within  $1.5 \times$  the interquartile range, and data beyond the end of the whiskers are outliers and are plotted as points. CPS, combined positive score.

**A**

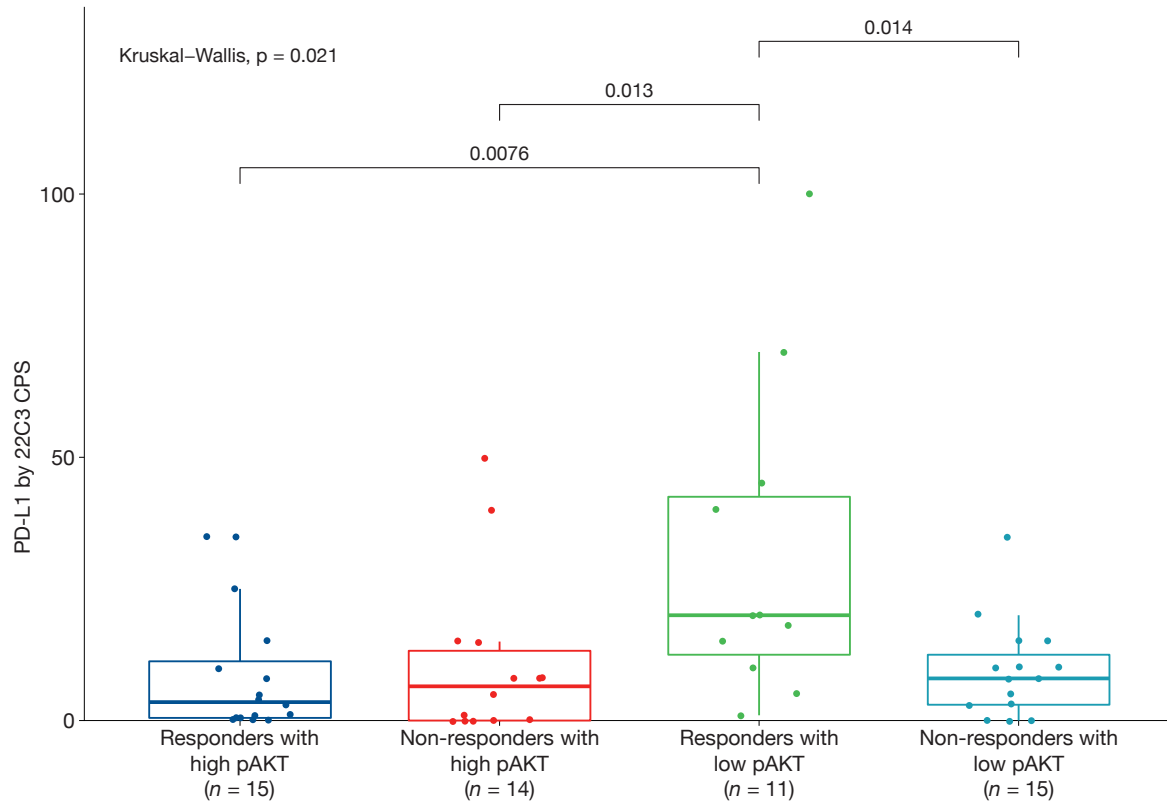

**B**

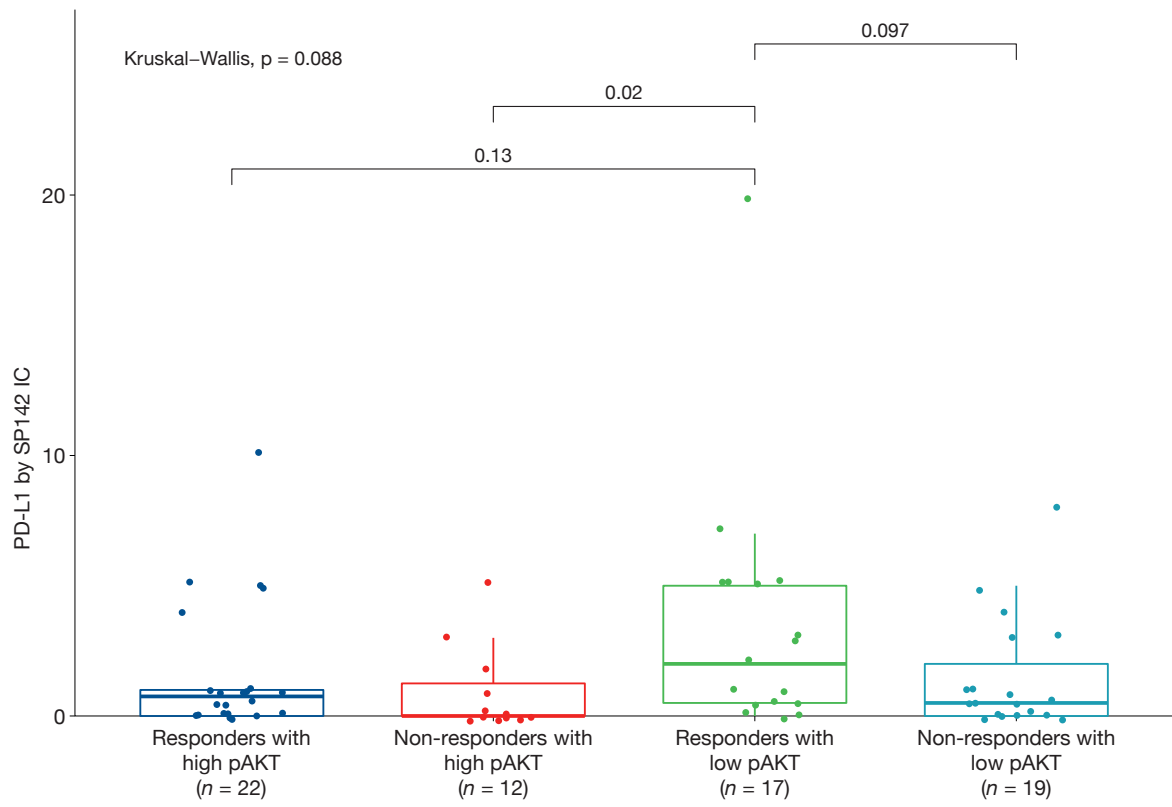

Supplement: ccr-23-2084_supplementary_tables_and_figures_1_suppds1.pdf [file ccr-23-2084_supplementary_tables_and_figures_1_suppds1.pdf]
